# Supplementary material for: New insights into quetiapine metabolism using molecular networking
Source: PubMed Central journal article supplement (PMC7669884; doi:10.1038/s41598-020-77106-x), 2020-11-16
Supplement: 41598_2020_77106_MOESM1_ESM.pdf [file 41598_2020_77106_MOESM1_ESM.pdf]

## **New insights into quetiapine metabolism using molecular networking**

Brendan Le Daré<sup>1,2\*</sup>, Pierre-Jean Ferron<sup>1</sup>, Pierre-Marie Allard<sup>3</sup>, Bruno Clément<sup>1</sup>, Isabelle Morel<sup>1,2</sup>, Thomas Gicquel<sup>1,2</sup>

1. *Univ Rennes, INSERM, INRAE, CHU Rennes, Institut NuMeCan (Nutrition, Metabolism and Cancer), PREVITOX network, F-35033 Rennes, France.*
2. *Rennes University Hospital, Forensic Toxicology Laboratory, F-35033 Rennes, France.*
3. *School of Pharmaceutical Sciences, and Institute of Pharmaceutical Sciences of Western Switzerland (ISPSW), University of Geneva, CMU, Rue Michel Servet 1, 1211 Geneva 4, Switzerland*

**Corresponding author:** Dr. Brendan Le Daré (ORCID: 0000-0002-5907-2450 and Publons: AAL-7050-2020)

**Address :** Laboratoire de toxicologie biologique et medico-légale, CHU Pontchaillou, 2 Rue Henri Le Guilloux, 35000 Rennes.

**E-mail:** [brendan.le.dare@chu-rennes.fr](mailto:brendan.le.dare@chu-rennes.fr)

## SUPPLEMENTARY DATA

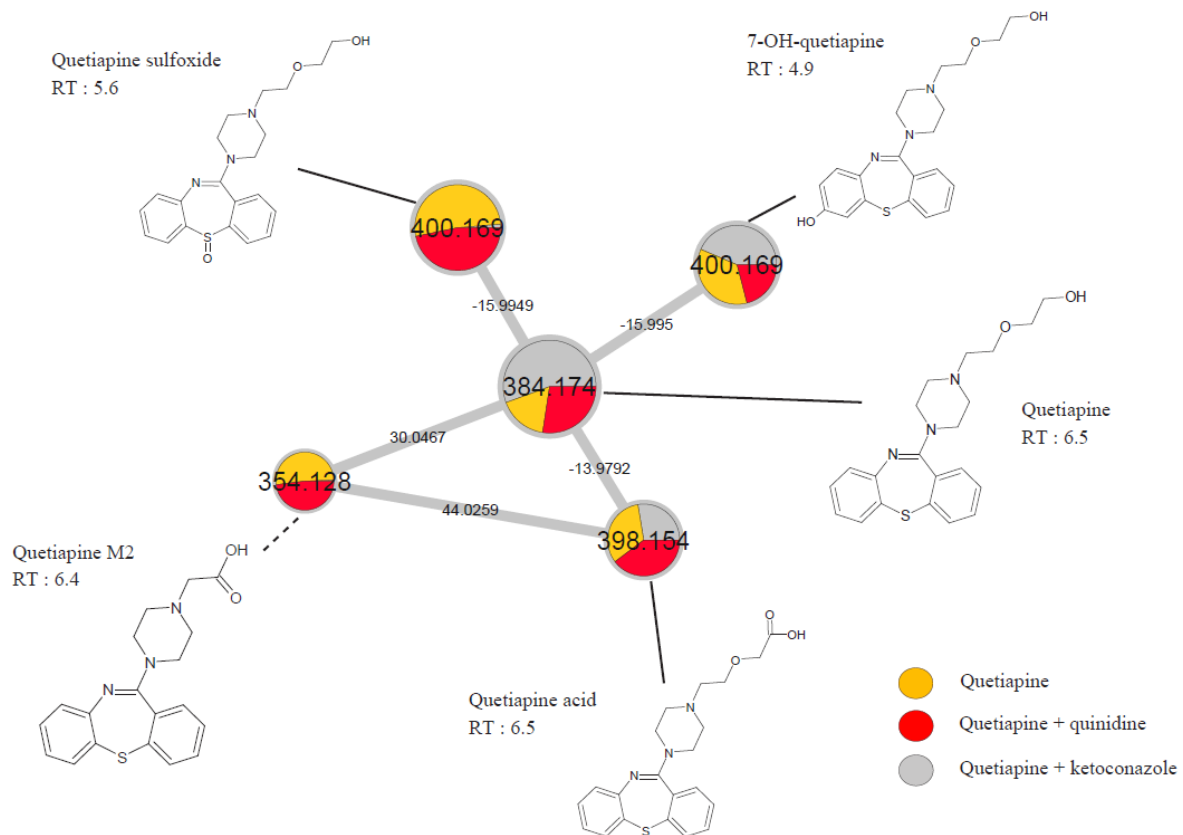

**Supplementary Figure 1: Extinction of CYP3A4/5 and CYP2D6 metabolic pathway in primary Human hepatocytes (pHH) using molecular networking.** pHH were incubated with quetiapine (13  $\mu\text{M}$ ) during H24 with or without cytochrome inhibitors. Ketoconazole (10  $\mu\text{M}$ ) is used as a CYP3A4/5 inhibitor and quinidine (10  $\mu\text{M}$ ) is used as a CYP2D6 inhibitor. Each experimental condition is depicted in a specific color: quetiapine in white, quetiapine + quinidine in red, quetiapine + ketoconazole in grey and quetiapine + quinidine + ketoconazole in green. Nodes are labelled with the exact protonated mass ( $m/z$ ), chemical structures and the links are labelled with the exact mass shift.

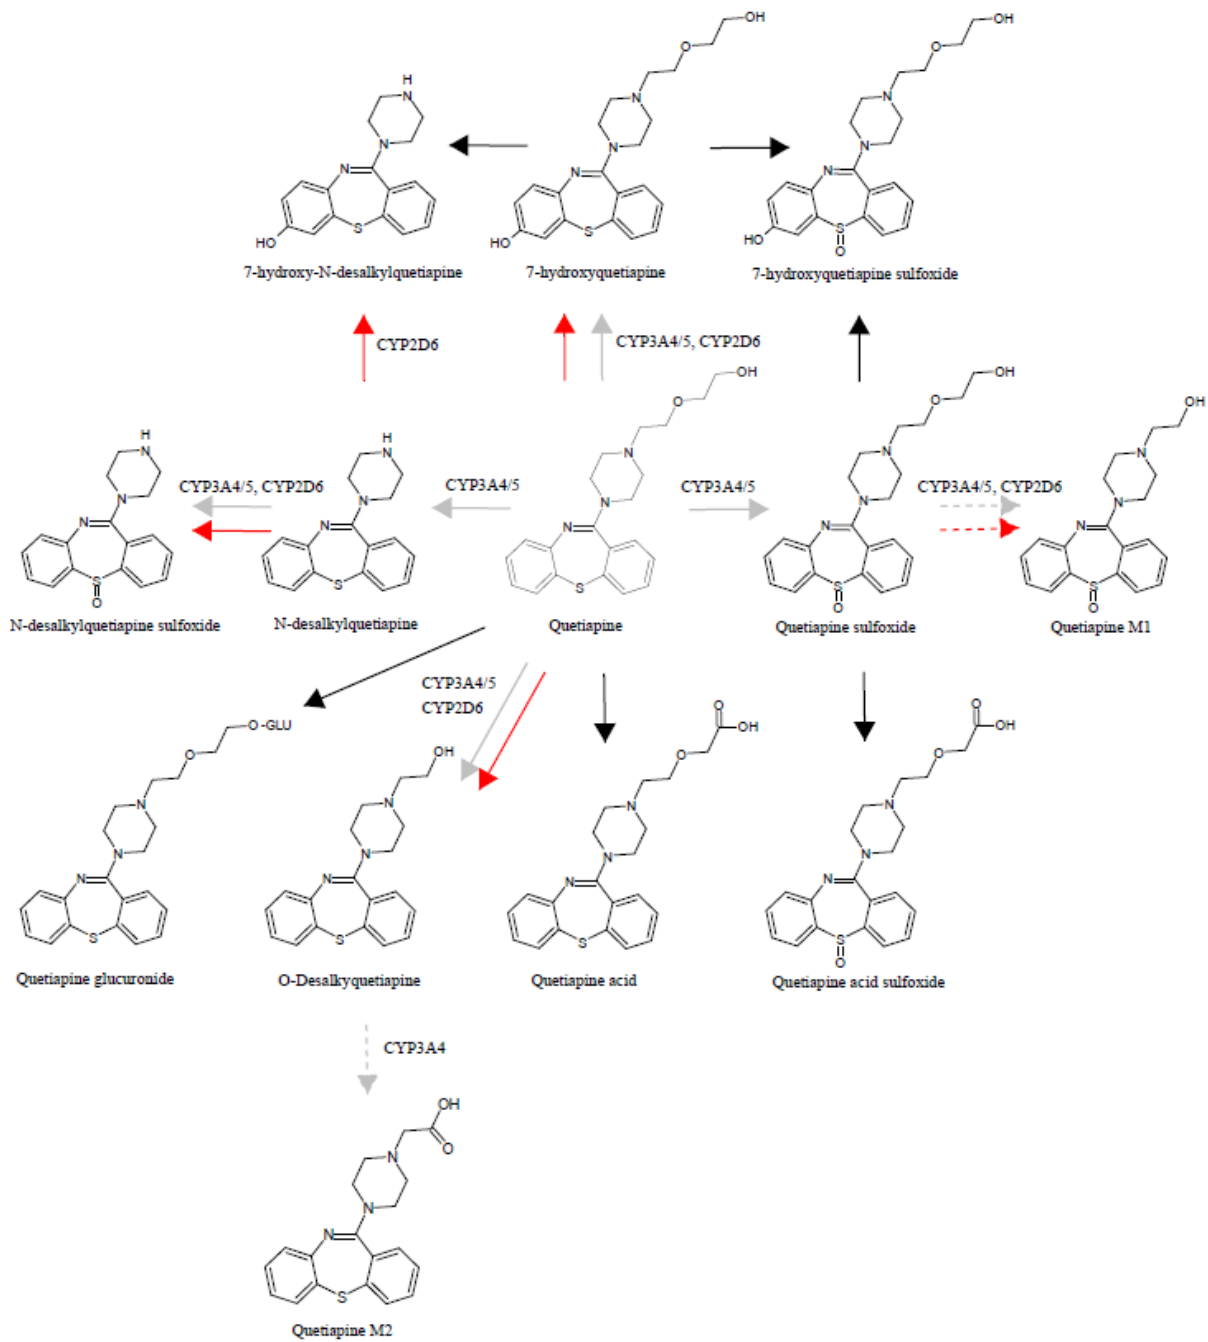

**Supplementary Figure 2: Quetiapine metabolism overview.** New putative identified metabolites are shown with a dash line. Metabolites for which metabolism involve CYP3A4/5 or CYP2D6 are shown with grey and red arrow, respectively.

**Supplementary Table 1:** Exact mass shift differences corresponding to biotransformations reactions

| Biotransformation               | Corresponding formula | Exact mass shift (Da) |
|---------------------------------|-----------------------|-----------------------|
| Oxidation + Dehydrogenation     | + H2 -O               | 13.970                |
| Oxidation                       | + O                   | 15.994                |
| Deacetylation + Dehydrogenation | - C2H4O               | 44.026                |
| Acetylation + oxidation         | + C2H2O2              | 58.005                |
| Glucuronidation                 | + C6H8O6              | 176.032               |

**Supplementary Table 2** Putative identified compounds or metabolites contained in the molecular network.

| $t_R$<br>(min) | Observed<br>$m/z$<br>[M+H <sup>+</sup> ] | Theoretical<br>$m/z$<br>[M+H <sup>+</sup> ] | Molecular<br>formula | $\Delta$ exact<br>mass<br>error | ESI-HRMS <sup>2</sup> data<br>( $m/z$ )                                               | Putative<br>compound<br>identification  | CYP involved<br>in compound<br>production<br>and/or<br>metabolism |
|----------------|------------------------------------------|---------------------------------------------|----------------------|---------------------------------|---------------------------------------------------------------------------------------|-----------------------------------------|-------------------------------------------------------------------|
| 4.4            | 312.1168                                 | 312.1170                                    | C17H17N3SO           | 0.0002                          | 70.07; 84.96; 89.06;<br>103.04; 226.03; 243.06;<br>269.07; 297.15                     | 7-hydroxy-N-<br>desalkylquetiapine      | -                                                                 |
| 4.9            | 400.1691                                 | 400.1695                                    | C21H25N3O3S          | 0.0004                          | 70.07; 96.08; 158.12;<br>208.10; 226.03; 237.10;<br>263.12; 269.07; 295.09            | 7-hydroxyquetiapine                     | CYP3A4/5                                                          |
| 5.5            | 356.1428                                 | 356.1432                                    | C19H21N3O2S          | 0.0004                          | 90.98; 103.04; 114.09;<br>221.11; 247.12; 269.07;<br>308.18                           | Quetiapine M1                           | CYP3A4/5,<br>CYP2D6                                               |
| 5.5            | 312.1162                                 | 312.1170                                    | C17H17N3SO           | 0.0008                          | 70.07; 195.09; 221.11;<br>247.12; 264.15                                              | N-desalkylquetiapine<br>sulfoxide       | CYP3A4/5,<br>CYP2D6                                               |
| 5.6            | 400.1690                                 | 400.1695                                    | C21H25N3O3S          | 0.0005                          | 68.05; 70.07; 158.12;<br>196.08; 221.11; 247.12;<br>269.07; 352.20;                   | Quetiapine sulfoxide                    | CYP3A4/5                                                          |
| 6.0            | 560.2066                                 | 560.2066                                    | C27H33N3O8S          | 0.0000                          | 70.07; 96.08; 132.10;<br>158.12; 210.04; 221.11;<br>247.12; 253.08; 279.10;<br>384.17 | Quetiapine<br>glucuronide               | None                                                              |
| 6.3            | 296.1217                                 | 296.1221                                    | C17H17N3S            | 0.0004                          | 70.07; 210.04; 221.11;<br>227.06; 253.08; 279.10                                      | N-desalkylquetiapine<br>(norquetiapine) | CYP3A4/5                                                          |
| 6.4            | 340.1478                                 | 340.1483                                    | C19H21N3O1S          | 0.0005                          | 88.08; 114.09; 210.04;<br>221.11; 247.12; 253.08;<br>279.10                           | O-desalkylquetiapine                    | CYP3A4/5,<br>CYP2D6                                               |
| 6.4            | 354.1273                                 | 354.1276                                    | C19H19N3O2S          | 0.0003                          | 59.05; 84.08; 210.04;<br>221.11; 247.12; 253.08;<br>279.10                            | Quetiapine M2                           | CYP3A4/5                                                          |
| 6.4            | 384.1741                                 | 384.1745                                    | C21H25N3O2S          | 0.0004                          | 59.05; 73.03; 158.12;<br>210.04; 221.11; 247.12;<br>253.08; 279.10                    | Quetiapine                              | CYP3A4/5,<br>CYP2D6                                               |
| 6.5            | 398.1534                                 | 398.1538                                    | C21H23N3O3S          | 0.0004                          | 70.07; 103.04; 146.08;<br>172.10; 210.04; 221.11;<br>247.12; 253.08; 279.10           | Quetiapine acid                         | ?                                                                 |
